# Supplementary material for: A genetic screen in C. elegans reveals roles for KIN17 and PRCC in maintaining 5’ splice site identity
Source: PubMed Central journal article supplement (PMC8865678; doi:10.1371/journal.pgen.1010028), 2022-02-10
Supplement: pgen.1010028.s002.pdf [file pgen.1010028.s002.pdf]

# Supplemental Table 2

| Fig 4C Results Student's T-test two-sample unequal variance |  |          |                            |                            |
|-------------------------------------------------------------|--|----------|----------------------------|----------------------------|
|                                                             |  | <i>n</i> | p value difference in % -1 | p value difference in % wt |
| SZ159 unc-73(e936a30) vs                                    |  | 2        |                            |                            |
| SZ300 unc-73(e936a30)dxbp-1(K23N)                           |  | 3        | 0.000184                   | 0.002441                   |
| SZ224 unc-73(e936a30)dxbp-1(M107I)                          |  | 3        | 0.001427                   | 0.003501                   |
| SZ301 unc-73(e936a30)prcc-1(I371F)                          |  | 3        | 0.000211                   | 0.004049                   |
