# Supplementary material for: A genetic screen in C. elegans reveals roles for KIN17 and PRCC in maintaining 5’ splice site identity
Source: PubMed Central journal article supplement (PMC8865678; doi:10.1371/journal.pgen.1010028), 2022-02-10
Supplement: pgen.1010028.s003.pdf [file pgen.1010028.s003.pdf]

## Supplemental Table 3

| <b>Fig 4E Results Student's T-test two-sample unequal variance</b> |                                          |          |                                  |                                  |                                    |                                    |
|--------------------------------------------------------------------|------------------------------------------|----------|----------------------------------|----------------------------------|------------------------------------|------------------------------------|
|                                                                    |                                          | <i>n</i> | p value<br>difference<br>in % -1 | p value<br>difference in<br>% wt | p value<br>difference in<br>%" -1" | p value<br>difference in<br>% "wt" |
| SZ263 unc-73(az100)                                                | vs                                       | 3        |                                  |                                  |                                    |                                    |
|                                                                    | SZ324 unc-73(az100)KIN-17(K23N)          | 2        | 0.039511                         | 0.042579                         | 0.152462                           | 0.388011                           |
|                                                                    | SZ310 unc-73(az100)KIN17(M107I)          | 3        | 0.011487                         | 0.145628                         | 0.100761                           | 0.051312                           |
|                                                                    | SZ320 & SZ322 unc-73(az100)PRCC-1(I371F) | 7        | 0.029563                         | 0.242385                         | 0.259814                           | 0.049619                           |
