# Supplementary material for: A genetic screen in C. elegans reveals roles for KIN17 and PRCC in maintaining 5’ splice site identity
Source: PubMed Central journal article supplement (PMC8865678; doi:10.1371/journal.pgen.1010028), 2022-02-10
Supplement: pgen.1010028.s007.pdf [file pgen.1010028.s007.pdf]

## Supplemental Table 7

| Figure 7E Results. Student's T-test two-sample unequal variance |              |              |              |              |              |
|-----------------------------------------------------------------|--------------|--------------|--------------|--------------|--------------|
|                                                                 | <b>SZ340</b> | <b>SZ345</b> | <b>SZ355</b> | <b>SZ346</b> | <b>SZ356</b> |
|                                                                 | smg-4 only   | KIN17(K23N)  | KIN17(M107I) | PRCC(I371F)  | PRCC(null)   |
| <i>n</i> animals                                                | 20           | 20           | 20           | 20           | 20           |
| average                                                         | 132.75       | 17.95        | 51.1         | 30.05        | 0.65         |
| variance                                                        | 1809.565789  | 611.1026316  | 2787.14737   | 931.7342105  | 0.344736842  |
| median                                                          | 139          | 5            | 41.5         | 23           | 1            |
| vs SZ340                                                        |              | 1.38E-11     | 4.48E-06     | 2.65E-10     | 2.11E-11     |
| vs SZ345                                                        |              |              | 0.01703957   | 0.176715658  | 0.005522461  |
| vs SZ355                                                        |              |              |              | 0.133000971  | 0.00041036   |
| vs SZ346                                                        |              |              |              |              | 0.000380032  |
