# Supplementary material for: A genetic screen in C. elegans reveals roles for KIN17 and PRCC in maintaining 5’ splice site identity
Source: PubMed Central journal article supplement (PMC8865678; doi:10.1371/journal.pgen.1010028), 2022-02-10
Supplement: pgen.1010028.s008.pdf [file pgen.1010028.s008.pdf]

## S1 Text - Suzuki et al.

# A Genetic Screen in *C. elegans* Reveals Roles for KIN17 and PRCC in Maintaining 5' Splice Site Identity

## CRISPR Strategies and Sequences

Suppressor mutations are bold and capitalized

Silent mutations for preventing recut or for restriction sites are capitalized or starred

### *unc-73*

ce10::chr1:4,021,905-4,022,020

*unc-73*(**e936**)

gcagtgtagcctagaaaagtgaacgatctcattcattacaactggttgattgaaggattcaagttagggcttg  
actttcaattaggtataattaggaatctgttttaagaga

Engineered mimic *unc-73*(**az63**) CRISPR repair oligo

gcagtgtagcctagaaaagtgaacgatctcattcattacaactggttggaTCTaaggattcaagTtagggcttg  
actttcaattaggtataattaggaatctgttttaagaga

CRISPR Guide RNA Alt-R IDT

auuugaaggauuucaggua

Forward Primer

gcagtgtagcctagaaaagt

Reverse Primer

gagcctactttaaggacga

Restriction Enzyme

Afl II - introduced

### *unc-73*(**az100**) “doubled doublet”

Engineered mimic *unc-73*(**az100**) CRISPR repair oligo

ctagaaaagtgaacgatctcattcattacaactggttgattgaaggattcaagTtagggctg**GAATTC**AAGITAGGG  
**CTTGGA**tagtgaatctgttttaagagaggctaatcccaggcttatctcttgaca

\* \*

crRNA and primers same as above

Restriction Enzyme

EcoR1 - introduced

Sequence changes indicated by asterisks (\*) introduced the EcoR1 cut site and maintained the frame

### *prcc-1* (I371F)

*prcc-1*(**az102**) a → t

cattgccacaagttcaaactcaaggacaaatgtcgagaagaaagcatcaatttacgtattggccagcttggaagagatattccagatttatag  
atatt

Engineered mimic *prcc-1*(**az122**) CRISPR repair oligo

cattgccacaagttcaaactcaaggacaaatgtcgagaagaaagcatcaaTttacCtatttAgccagcttggaagagatattccagatttatag  
gattt

CRISPR Guide RNA Alt-R IDT

aaagcaucaaaauuacguuu

Forward Primer

agcagcatggatgtagtgg

Reverse Primer ggTTTTgatgcaagtaaagcctg  
Restriction Enzyme SnaBI - removed

**prcc-1(null)**

kind gift from Moerman Lab, *C. elegans* Deletion Mutant Consortium [60]  
ce10::ChrIV:13093755-13091035

Engineered null *prcc-1*(**gk5556**[*loxP*+*Pmyo-2*::*GFP*::*unc-54* 3' UTR+*Prps-27*::*neoR*::*unc-54* 3' UTR+*loxP*]) IV CRISPR repair oligo  
ttgtttatttcgctctgaaattattcgtttctcgaagaattctctcaaaaatggccttggtgattacgc/gtggagatgaaatctgcgtaga  
tcaaacacttttaagagctgtgctagaaatcacataattcactta

N Terminus CRISPR Guide aggatgggccttggtgattacgc  
Forward Primer agttccgatttcttcccgc  
Reverse Primer gagttgtgattttgtggagcg

C Terminus CRISPR Guide cgcagatttcatactccacgagg  
Forward Primer ggacaaaatgctgagaagaaagc  
Reverse Primer cagacaatctctgcctgtcc

Flanking sequences GTTCGACATTTTCAGACAATCTCTGCCTGTC  
GCCCATTTTGAGAAGAATTCTTCGAAGAA

Deletion size 2661 bp (all coding regions)

**dxbp-1 (K23N)**

ce10::chrI:11,038,694-11,038,822

*dxbp-1*(**az105**) t → a  
aaaattaattatttttaatttttacttaaaaagtgccatacaattcaaattttgtaatcctttcgattttgttcgatttgccaagtctttgaaat  
tccttttcggttttccatttttaaatct

Engineered mimic *dxbp-1*(**az121**) CRISPR repair oligo  
aaaattaattatttttaatttttacttaaaaagtgccatacaattcaa**AttCTGCAG**tccttt**G**gattttgttcgatttgccaagtctttt  
gaacttccttttcggttttcc

CRISPR Guide gcaaatcgaacaaaatcgaa  
Forward Primer (in Y52B11A.10) ttgttcctccgacattc  
Reverse Primer (in Exon 2) gtgctcggagtaagtgg  
Restriction Enzyme PstI - introduced

**dxbp-1 (M107I)**

ce10::chrI:11,037,151-11,037,290

*dxbp-1*(**az33**) g → a  
atcggttctgctagggcgctgacttacgttcggagccaccaatcacaaatttcagggtcacgtgcacataaactctacagtatggc  
actcgttgacaggcttcgtccagatctcggatcatctggaatgtaaaatc

Engineered mimic *dxbp-1*(**az52**) CRISPR repair oligo  
Atcggttctgctagggcgctgacttacgttcggagccaccaatcacaaatttcagggtcacgtgcacat**A**aactcCacCgtatg  
gcactcgttgacaggcttcgtccagatctcggatcatctggaatgtaaaatc
